# Supplementary material
Source: PubMed Central journal article supplement (PMC2429937)
Supplement: rsbl20070622s15.pdf [file rsbl20070622s15.pdf]

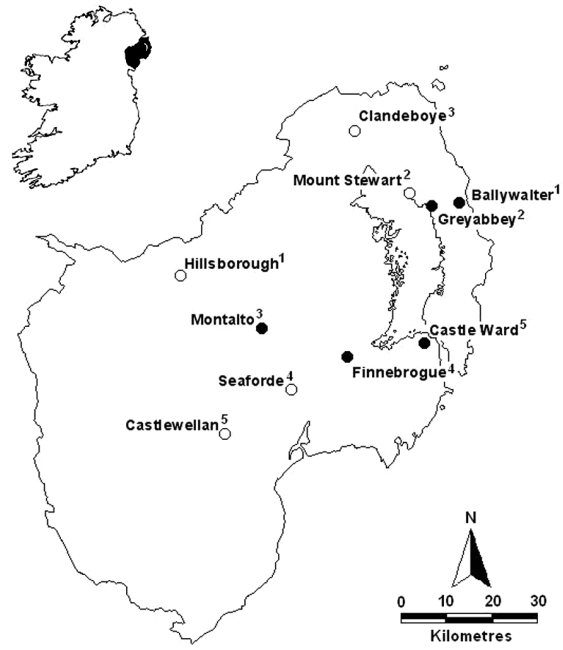

**Figure 1.** Location of the ten study sites in County Down (inset). Fed sites are shown by filled circles (●) and unfed by unfilled (○). Numbers represent site pairing.
